# Supplementary material for: Synthesis and structural and dielectric properties of Ca-doped PbTiO3 ceramics prepared by a hydrothermal method
Source: Royal Society of Chemistry journal article supplement (doi:10.1039/d1nj02693c), 2021-01-01
Supplement: d1nj02693c1.pdf [file d1nj02693c1.pdf]

## Synthesis, structural and dielectric properties of Ca doped $\text{PbTiO}_3$ ceramics prepared by hydrothermal method

E.H. LAHRAR<sup>a,\*</sup>, O. EL GHADRAOUI<sup>a</sup>, M. ZOUHAIRI<sup>c</sup>, A. HARRACH<sup>a</sup>, T. LAMCHARFI<sup>b</sup>, E.H. EL GHADRAOUI<sup>a</sup>

<sup>a</sup>*Process, Materials and Environment Laboratory, Faculty of Sciences and Technologies of Fez, Sidi Mohamed Ben Abdellah University, B.P. 2022, Fez, Morocco*

<sup>b</sup>*Signals, Systems and Components Laboratory, Faculty of Sciences and Technologies of Fez, Sidi Mohamed Ben Abdellah University, B.P. 2022, Fez, Morocco*

<sup>c</sup>*Crystalline engineering materials team, Materials, Membranes and Nanotechnology Laboratory, Faculty of Sciences, Moulay Ismail University of Meknès, Meknès city, Morocco*

\* corresponding author. Tel: +212613447889  
E-mail address : elhoucine.lahrar@usmba.ac.ma (E.H. Lahrar)

Journal in which to be published: New Journal of Chemistry (NJC)
